# Supplementary material for: Viral gene drive in herpesviruses
Source: PubMed Central journal article supplement (PMC7522973; doi:10.1038/s41467-020-18678-0), 2020-09-28
Supplement: 41467_2020_18678_MOESM1_ESM.pdf [file 41467_2020_18678_MOESM1_ESM.pdf]

| Primer name                 | Sequence               |              |
|-----------------------------|------------------------|--------------|
| UL23 left homology arm F    | GCGACGACGATCGTTTCTTT   | Fig. 3d, S1b |
| UL23 left homology arm R    | CTTGTAGTCTCCGTCGTGGT   | Fig. 3d, S1b |
| UL23 Right homology arm F   | CAACTTGAAAAAGTGGCACCGA | Fig. 3d, S1b |
| UL23 Right homology arm R   | TTGTGAACGCGGTTATCGTG   | Fig. 3d, S1b |
| UL23 cut site F             | GCTTGGGGCATAAAACACCG   | Fig. S1b     |
| UL23 cut site R             | CCCAGGTACAGTTCAGACGG   | Fig. S1b     |
| eGFP F                      | CTTCAGCTCGATGCGGTTC    | Fig. 3b-c    |
| eGFP R                      | GACGTAAACGGCCACAAGTTC  | Fig. 3b-c    |
| mCherry F                   | AGTTCATGCGCTTCAAGGTG   | Fig. 3b-c    |
| mCherry R                   | GTCTTGACCTCAGCGTCGTA   | Fig. 3b-c    |
| Genotyping TB40/E mCherry F | TCCCGTACTGCATGTTCCAC   | Fig. S1c     |
| Genotyping TB40/E mCherry R | CAGAGAACGTCACACCGTCA   | Fig. S1c     |

Supplementary Table 1: Primers

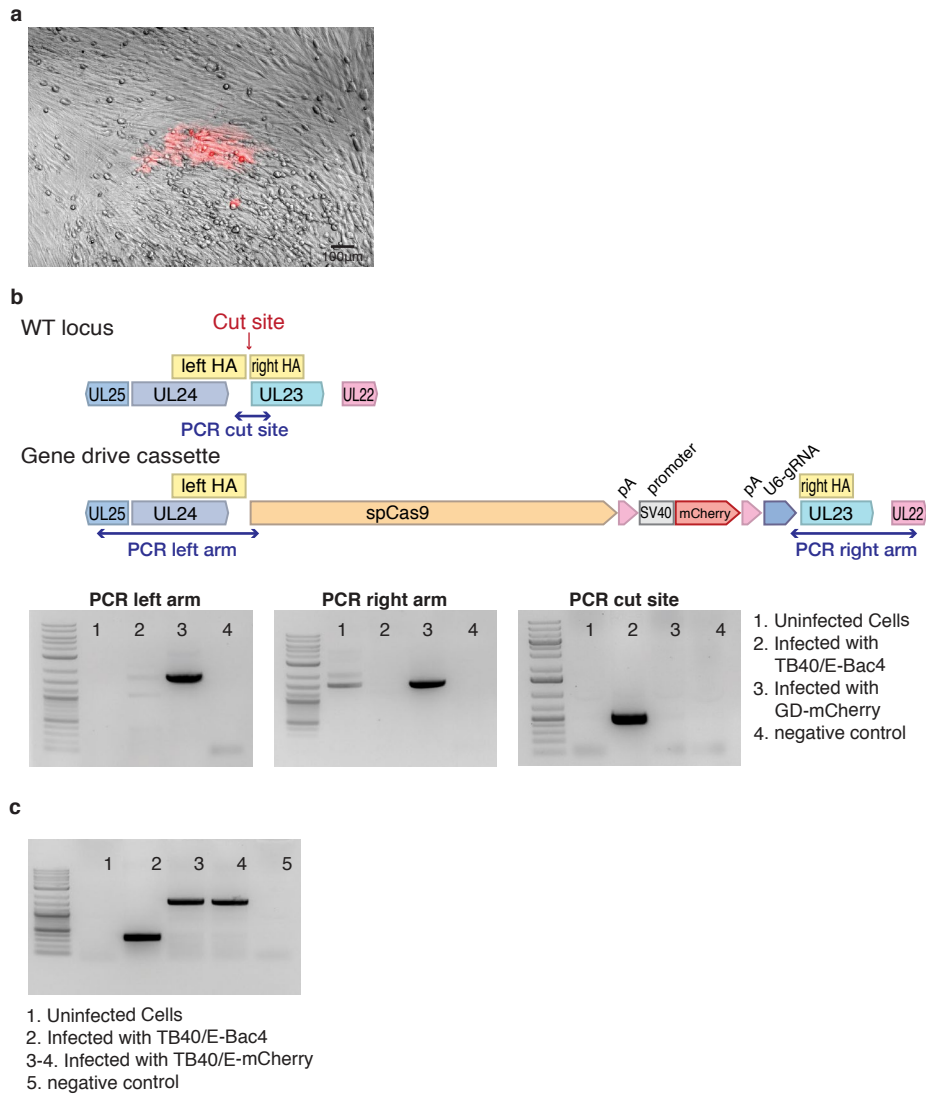

**Supplementary Figure 1: Generation of gene drive viruses.**

**a**, Representative image of a mCherry-expressing viral plaque spreading into human fibroblasts, approximately 10 days after transfection with the gene drive donor plasmid and infection with hCMV (TB40/E strain). **b**, Genotyping PCR of pure GD-mCherry population and primer localization. **c**, Genotyping PCR of pure TB40/E-mCherry population.

Source data are provided as a Source Data file.

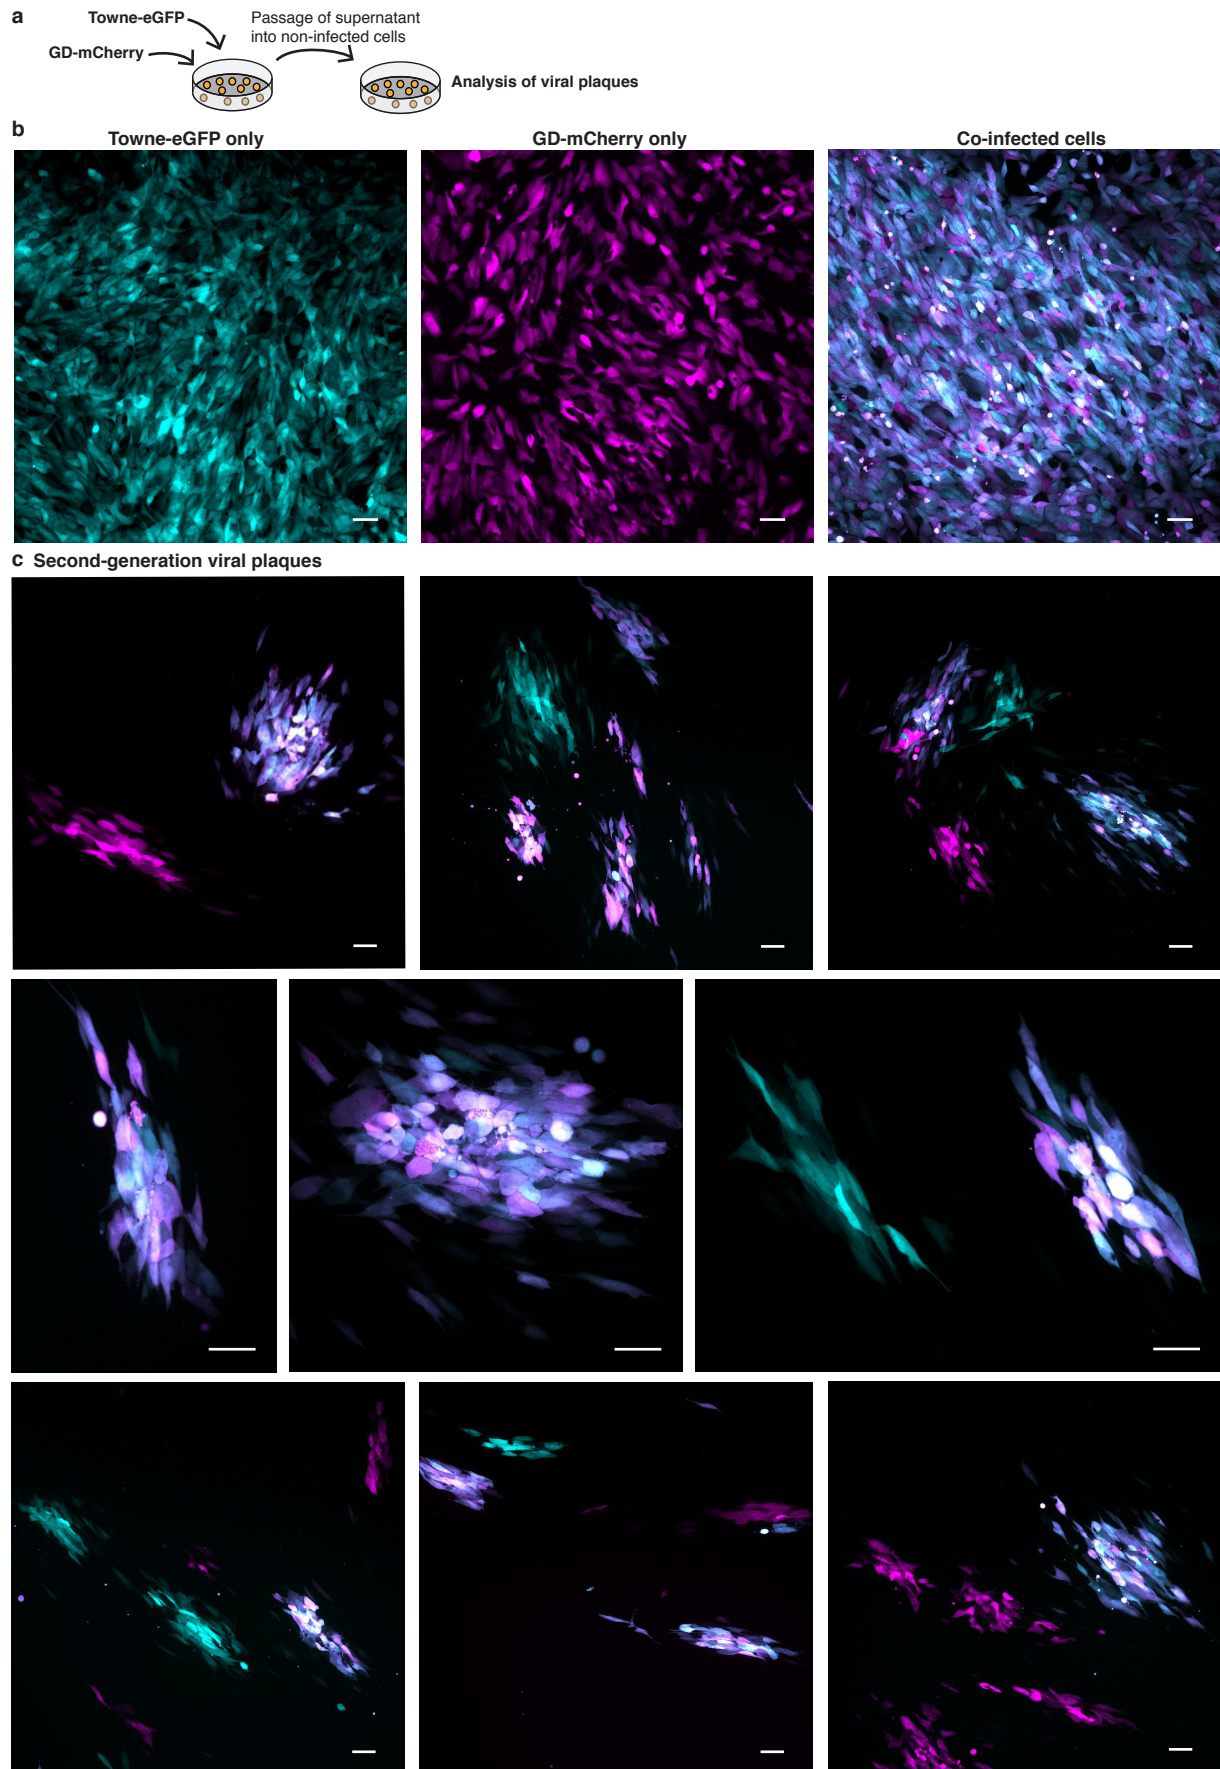

**Supplementary Figure 2: Recombinant viral plaques.**

**a**, Experimental scheme: fibroblasts were coinfected with Towne-eGFP and GD-mCherry, and supernatants used to infect fresh cells. **b**, Images of cells infected with Towne-eGFP, GD-mCherry, or both. **c**, Images of second generation recombinant viral plaques. Scale bars: 100µm.

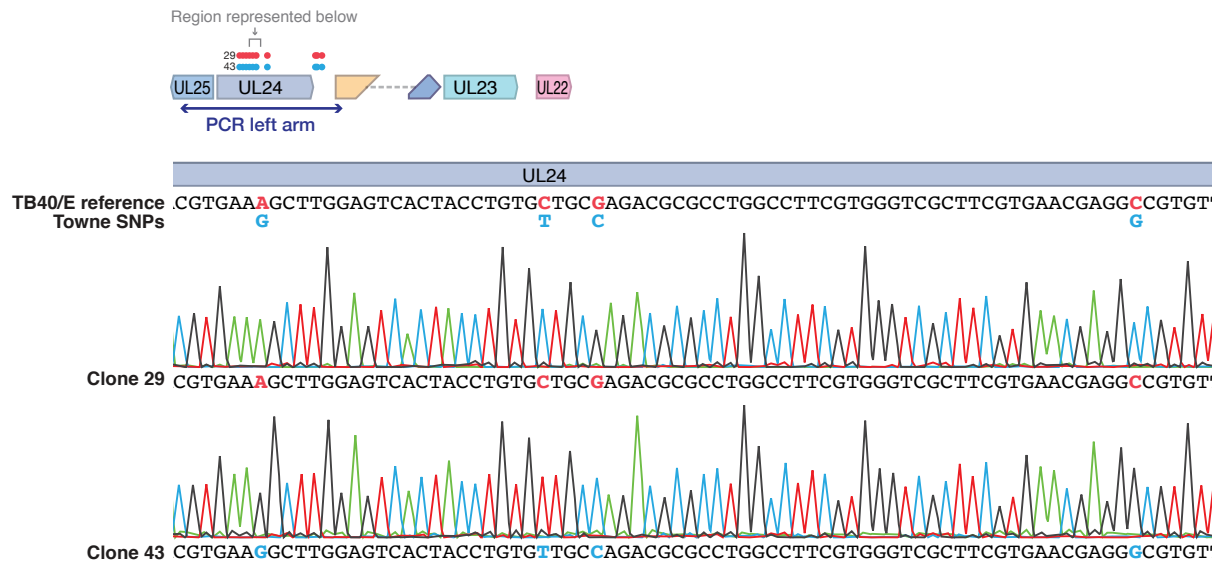

**Supplementary Figure 3: Sanger sequencing of homology arms.**

Example of Sanger sequencing of the left homology arm of two BAC clones. Clone 29 harbor Single Nucleotide Polymorphisms (SNPs) from TB40/E strain, and clone 43 has SNPs from Towne strain.



**Run Statistics**

|                      | Biological Replicate 1 |                       | Biological Replicate 2 |
|----------------------|------------------------|-----------------------|------------------------|
|                      | Technical replicate 1  | Technical replicate 2 |                        |
| Active channels:     | 507                    | 413                   | 511                    |
| Mean read length:    | 8,786.7                | 5,397.6               | 610.2                  |
| Mean read quality:   | 8.8                    | 6.3                   | 7.1                    |
| Median read length:  | 1961                   | 531                   | 394                    |
| Median read quality: | 9.6                    | 7                     | 7.5                    |
| Number of reads:     | 215,906                | 45,099                | 4,005,433              |
| Read length N50:     | 41,608                 | 51,314                | 729                    |
| Total bases:         | 1897092928             | 243427955             | 2444168486             |

**Number and percentage of reads above quality cutoffs**

|             | Biological Replicate 1 | Biological Replicate 2 | Biological Replicate 2 |
|-------------|------------------------|------------------------|------------------------|
| >Q5:        | 195,035 (90.3%)        | 26,493 (58.7%)         | 3,315,315 (82.8%)      |
| >Q7:        | 182,970 (84.7%)        | 22,550 (50.0%)         | 2,373,956 (59.3%)      |
| >Q10:       | 80,464 (37.3%)         | 7,141 (15.8%)          | 164,324 (4.1%)         |
| >Q12:       | 109 (0.1%)             | 20 (0.0%)              | 125 (0.0%)             |
| >Q15:       | 0 (0.0%)               | 0 (0.0%)               | 0 (0.0%)               |
| >Q6, >1kb   | 98,177 (37.6%)         |                        | 271,924 (6.8%)         |
| >Q6, >10kb  | 41,779 (16.0%)         |                        | 9,926 (2.5%)           |
| >Q6, >200kb |                        | 59 (0.0013%)           |                        |

**Lengths of the 5 longest reads and their mean quality score**

|  | Biological Replicate 1 | Biological Replicate 2 | Biological Replicate 2 |
|--|------------------------|------------------------|------------------------|
|  | 228,187 (Q7.9)         | 335,524 (Q8.7)         | 319,495 (Q9.2)         |
|  | 225,747 (Q8.8)         | 325,349 (Q7.9)         | 306,840 (Q7.4)         |
|  | 224,638 (Q7.7)         | 262,541 (Q7.7)         | 250,515 (Q8.3)         |
|  | 220,568 (Q7.8)         | 260,168 (Q9.0)         | 243,209 (Q8.8)         |
|  | 219,597 (Q7.8)         | 233,939 (Q10.0)        | 237,368 (Q8.3)         |

**Mapping statistics**

|                         | Biological Replicate 1 | Biological Replicate 2 |
|-------------------------|------------------------|------------------------|
| mapped read (%)         | 175,389 (96.67%)       | 3,370,381 (89.53%)     |
| >Q6 on human hg38       | 71,753 (39.54%)        | 2,955,995 (78.52%)     |
| on hCMV-Towne           | 103,636 (57.12%)       | 414,386 (11.0%)        |
| mapped read (%)         | 96,722 (98.52%)        | 269,868 (99.24%)       |
| >Q6 >1kb on human hg38  | 13,776 (14.03%)        | 213,728 (78.59%)       |
| on hCMV-Towne           | 82,946 (84.4%)         | 56,140 (20.6%)         |
| mapped read (%)         | 41,637 (99.66%)        | 9,883 (99.57%)         |
| >Q6 >10kb on human hg38 | 328 (0.78%)            | 290 (2.92%)            |
| on hCMV-Towne           | 41,309 (98.9%)         | 9,593 (96.6%)          |

**Histogram of read lengths**

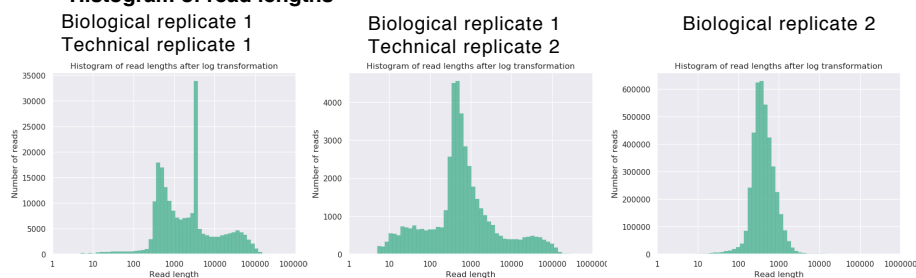

**Supplementary Figure 4: Oxford Nanopore sequencing statistics.**

Linear viral DNA was extracted from virions and subjected to long-read sequencing using Oxford Nanopore sequencing. The first biological replicate was sequenced in two technical replicates.

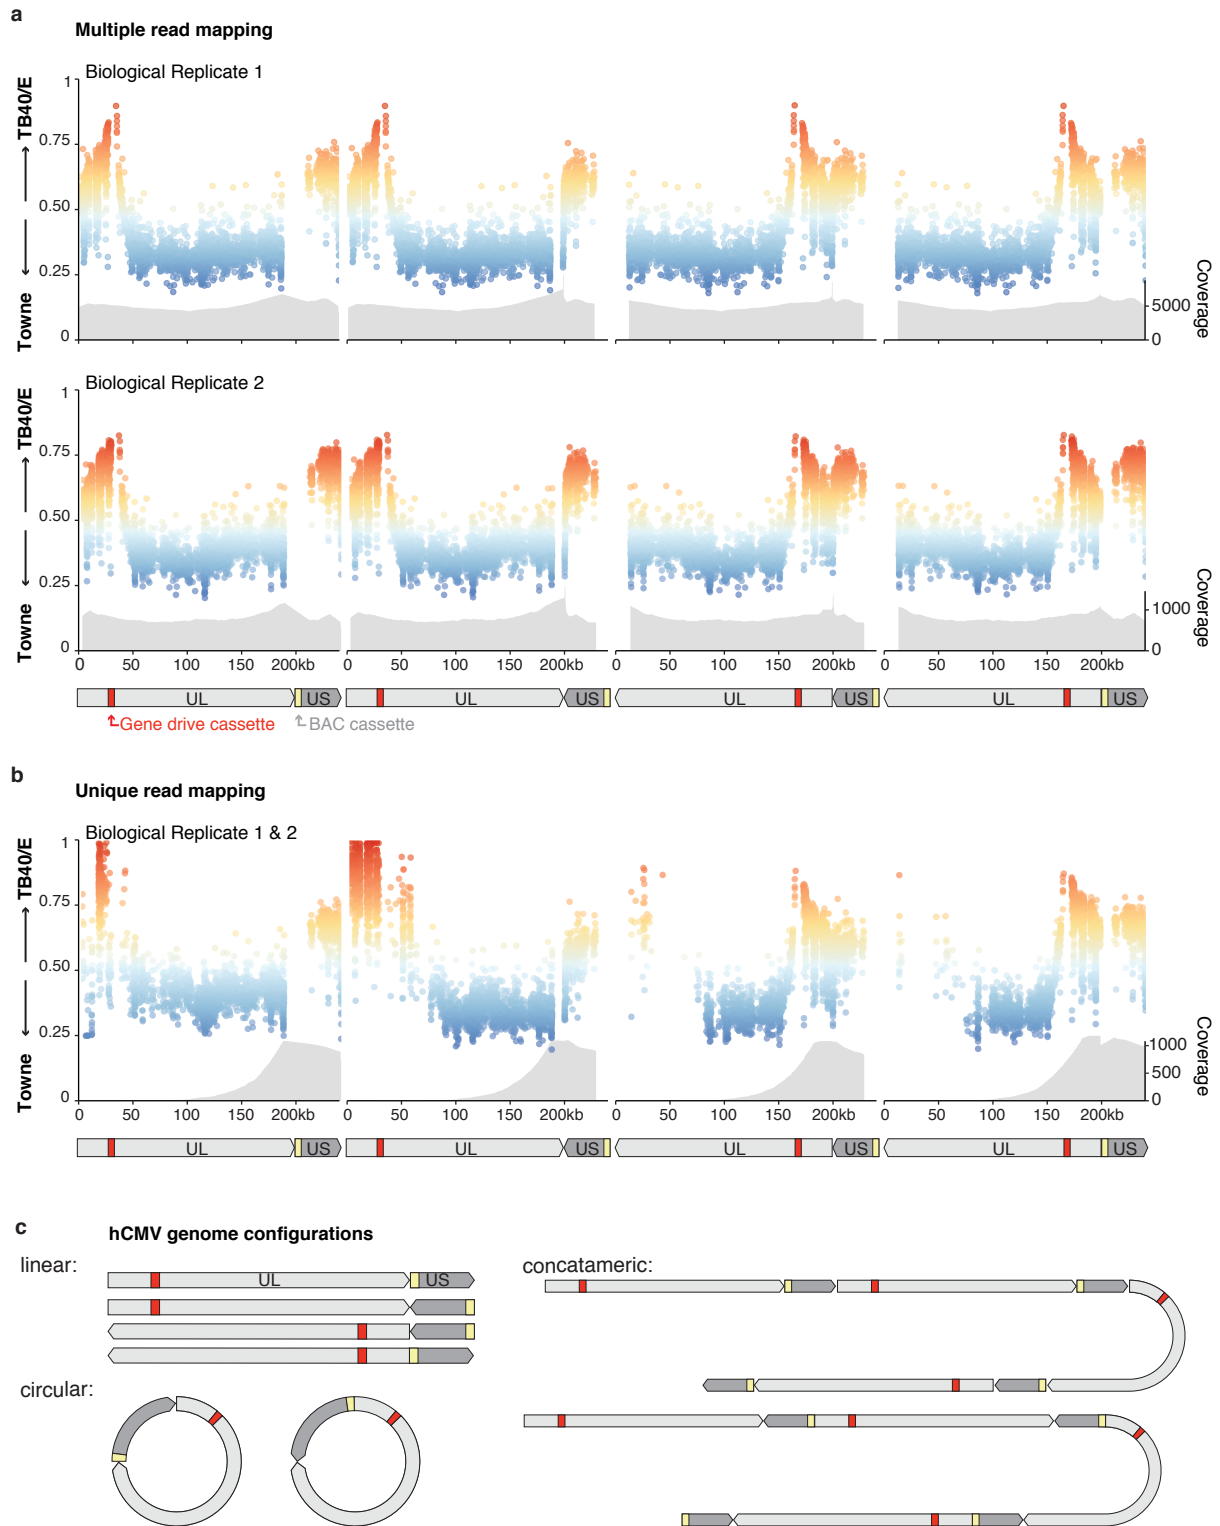

**Supplementary Figure 5: SNP proportion in the four genome orientations.**

**a**, Fraction of SNPs of Towne or TB40/E origin in the four different genome configurations. Each dot represents an individual SNP. Coverage gives the number of reads. Reads mapping ambiguously into one or multiple genome configurations. **b**, Same as **a**, but with reads mapping unambiguously into a unique genome configuration. **c**, The hCMV genome can be found in four linear or two circular/concatameric genome configurations, depending on the respective orientation of the long (UL) and short (US) genome segments.

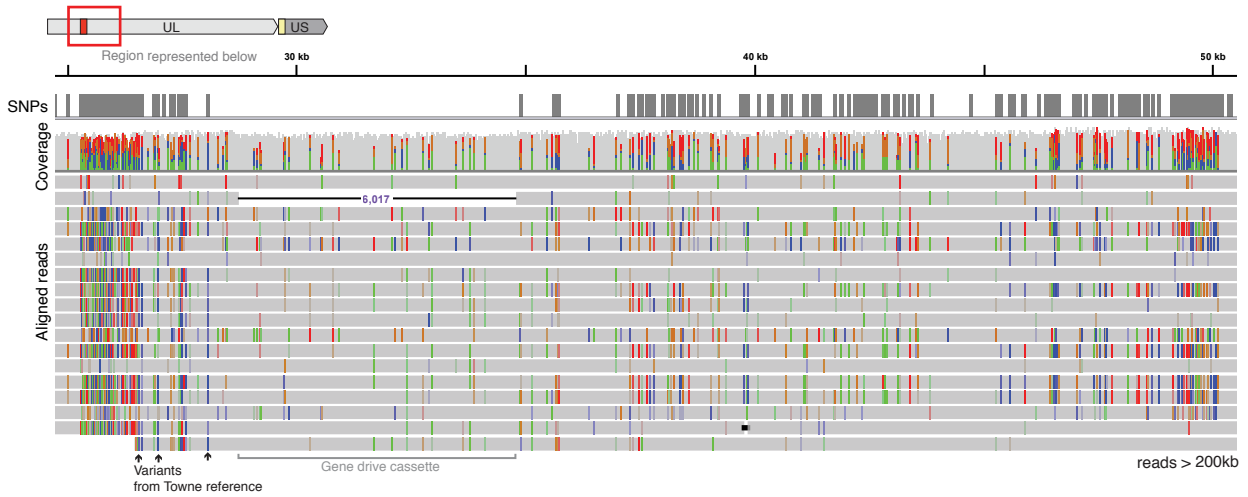

**Supplementary Fig. 6: Reconstruction of recombination history from long reads.**

IGV screenshot showing individual long reads (>200 kb) mapped into Towne reference sequence. Reads are noisy with numerous errors, but clusters of variants matching the SNP map allowed us to reconstruct the strain of origin.

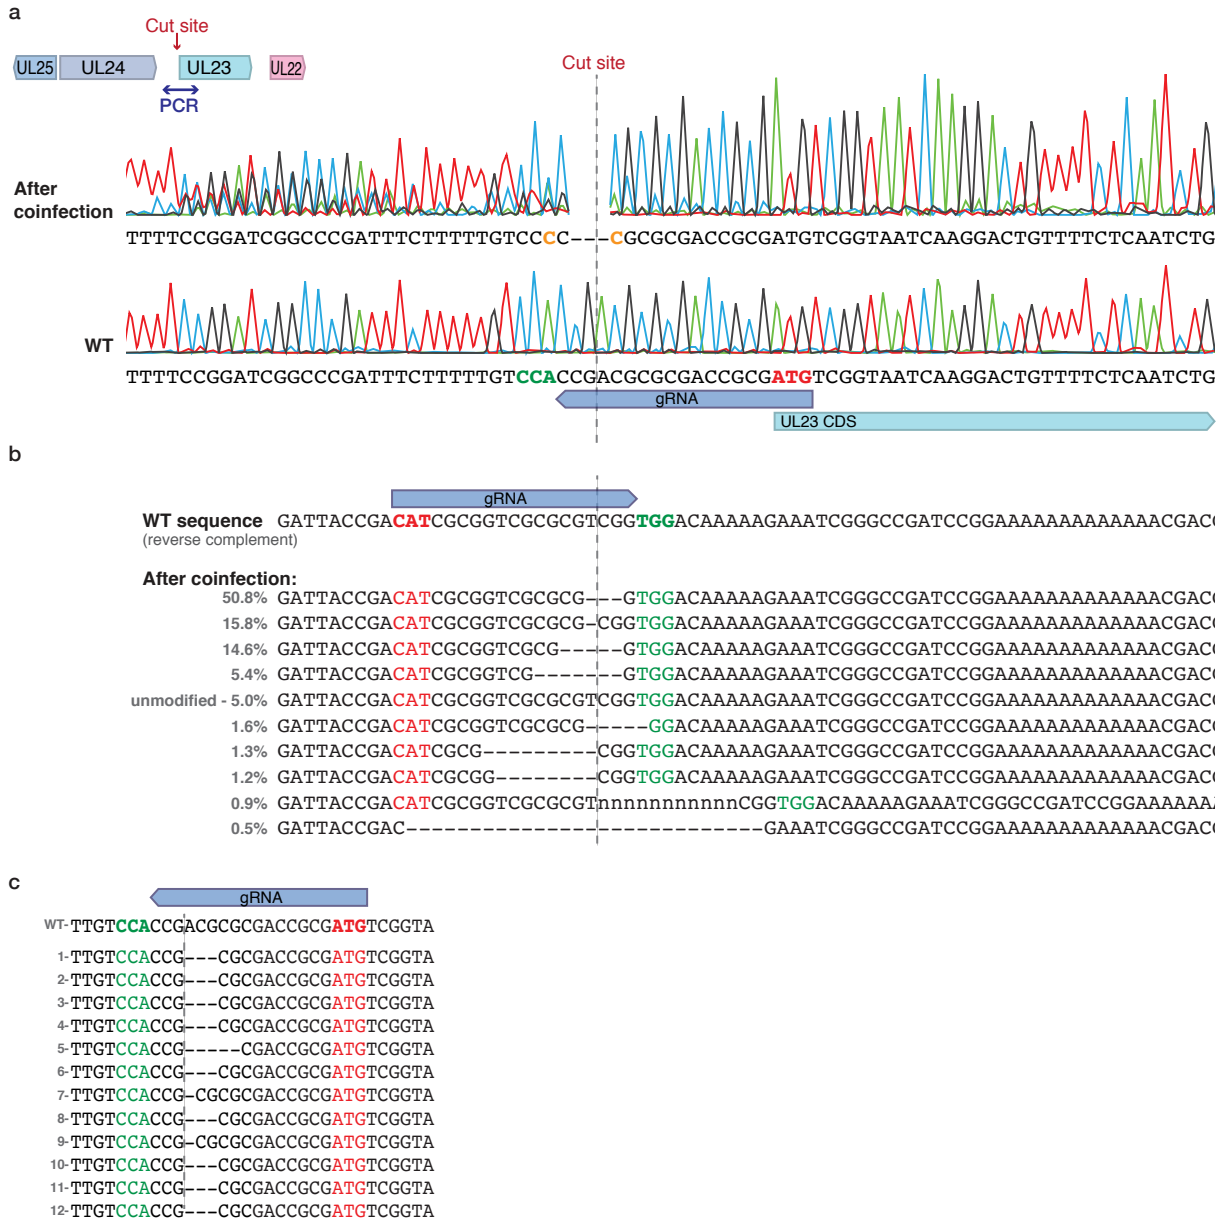

**Extended Data Fig. 7: Sanger sequencing of drive-resistant viruses.**

**a**, PCR and Sanger sequencing of the target site after coinfection with GD-mCherry and Towne-eGFP for 10 days. PCR was performed on the pool of coinfecting cells. **b**, Deconvolution of sanger sequencing showing the relative contribution of each edits, using Synthego ICE online tool. **c**, Sequencing of 12 GFP-only viral clones isolated from 3 independent coinfection experiments. Panel **a** and **b** show one example representative of multiple biological replicates, with a specific 3bp deletion representing 40-60% of edits.

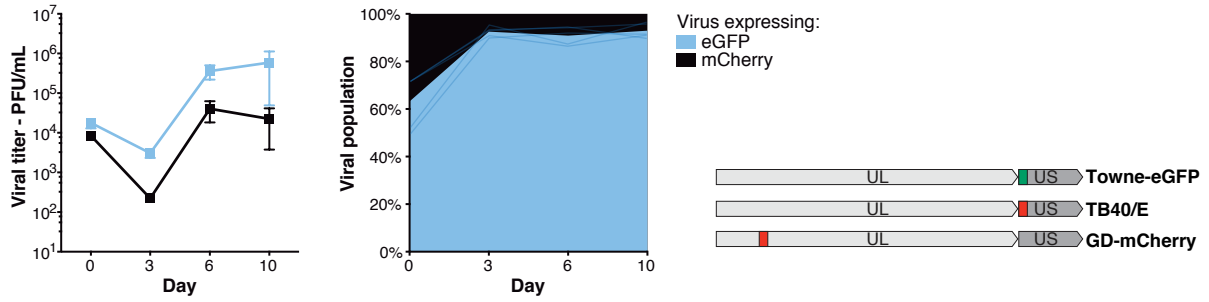

**Supplementary Figure 8: Coinfection with Towne-eGFP and TB40/E.**

Viral titer and proportion of viruses expressing eGFP alone, mCherry alone, after coinfection with equal amount of Towne-eGFP and TB40/E. n=5. Titers are expressed in PFU/mL. Error bars represent SEM between biological replicates. Source data are provided as a Source Data file.

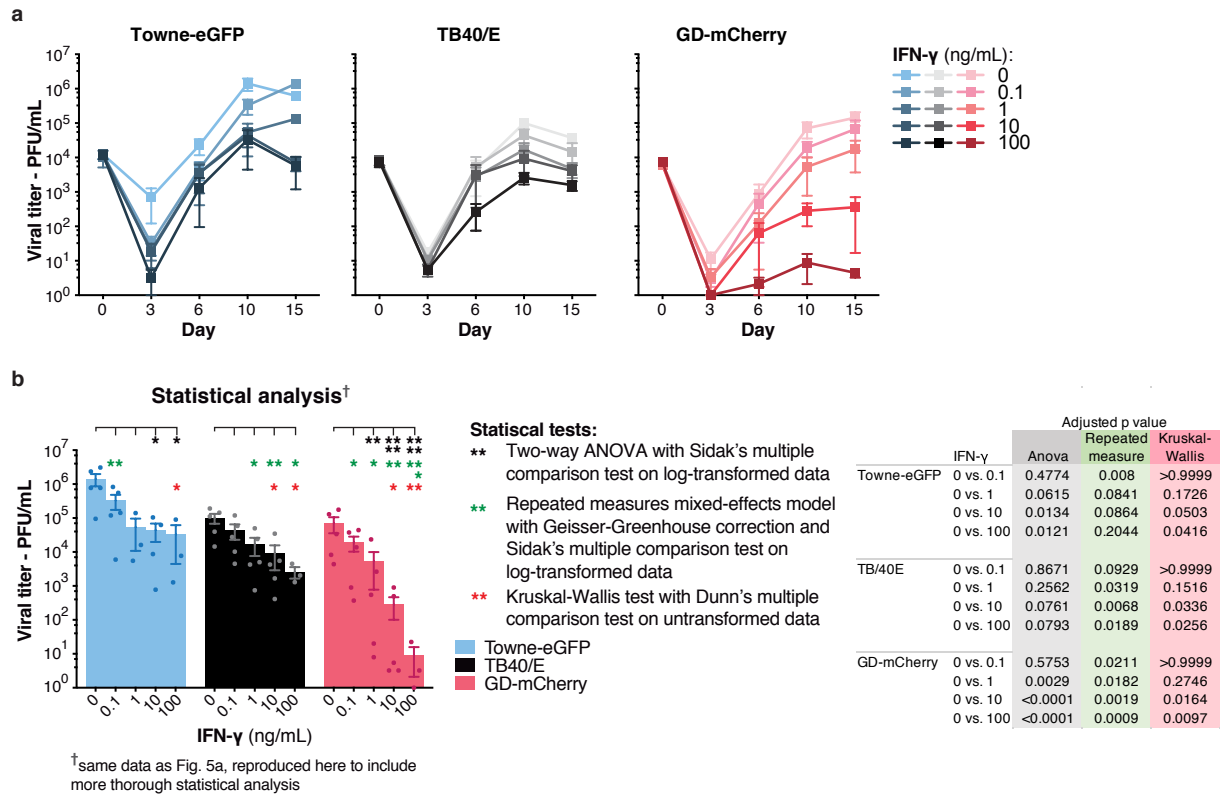

**Supplementary Fig. 9: Viral titer in presence of IFN- $\gamma$ .**

**a**, Viral titer of single infections, in the presence of IFN- $\gamma$ , measured by plaque assay. Data for D10 are also shown in Fig. 5a. and panel **b**. **b**, Viral titer at D10 in presence of increasing concentration of IFN- $\gamma$ . Same figure as Fig. 4a with thorough statistical analysis. The table gives the adjusted p-value for every comparison for the different tests. Of note, two-way ANOVA or other parametric tests on untransformed data gave no significant results. Titters are expressed in PFU/mL. Error bars represent SEM between biological replicates. \*, p-value < 0.05; \*\*, p < 0.01; \*\*\*, p < 0.001; \*\*\*\*, p < 0.0001. n=3 (IFN- $\gamma$  = 100ng/mL) or n=5 (other concentrations). Source data are provided as a Source Data file.



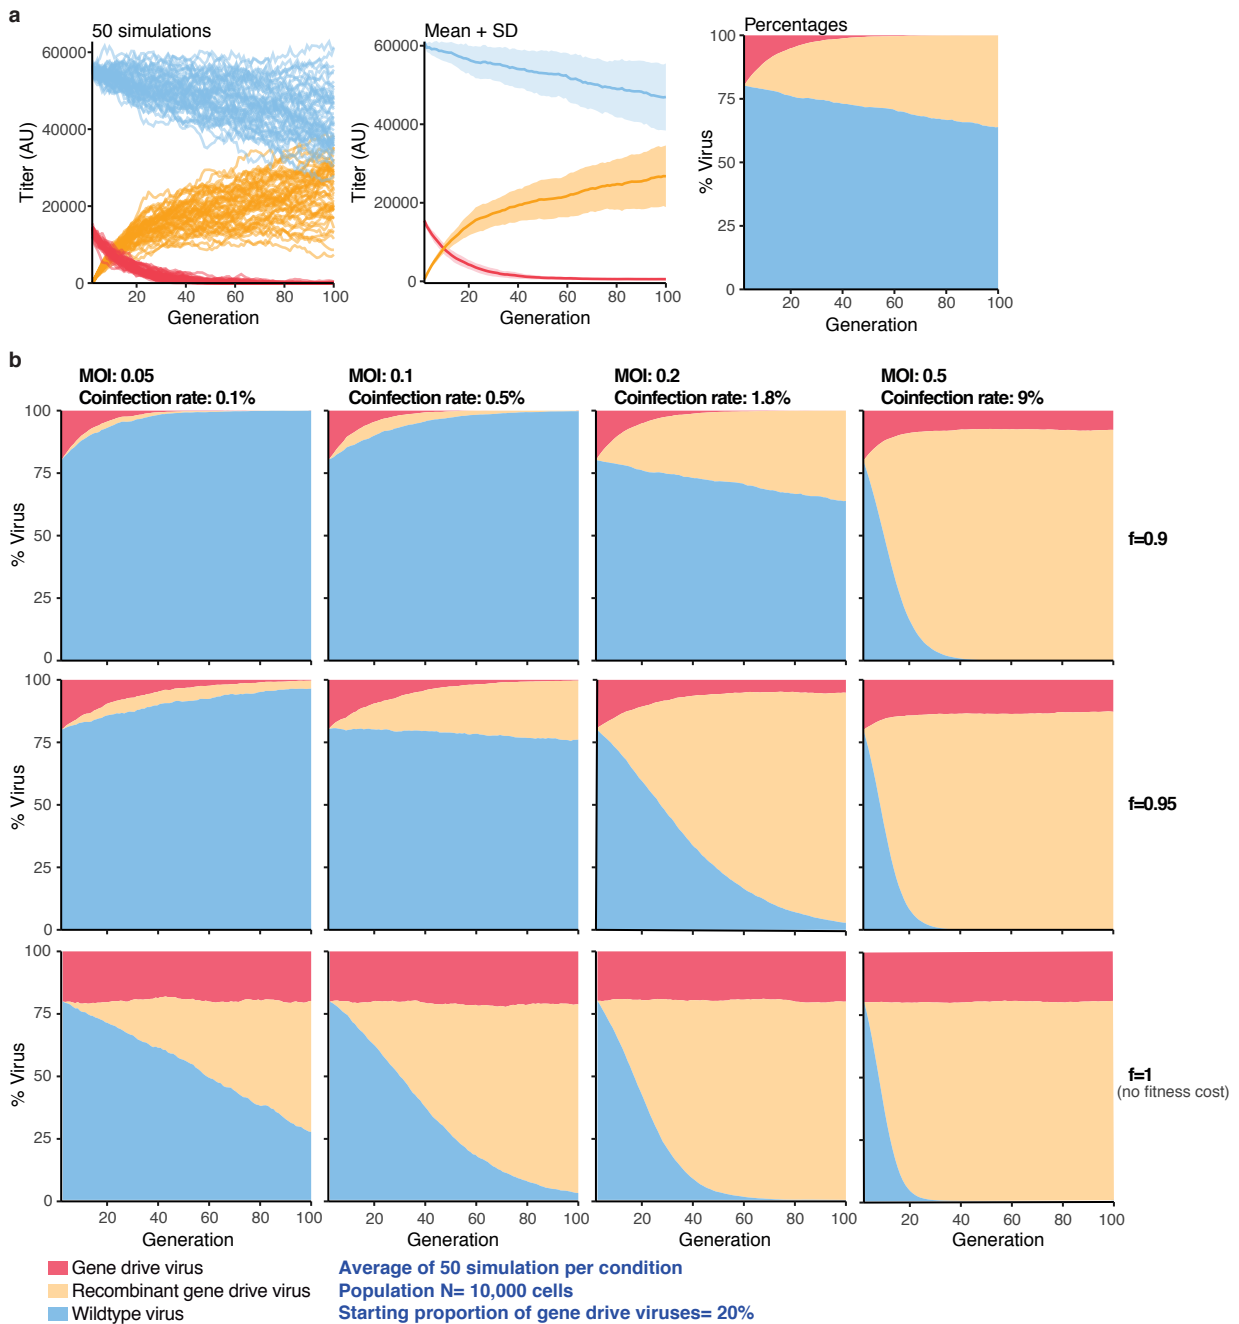

**Supplementary Figure 10: Numerical simulation: variation of coinfection rate and fitness cost  $f$  of gene drive viruses.**

Numerical simulation showing that the spread of gene drive virus in the wildtype population depends of the coinfection rate and of the replicative fitness cost  $f$  of gene-drive viruses. In these simulations, at each viral generation,  $N$  virtual cells were randomly infected and coinfecting by  $N \cdot \text{MOI}$  viruses, producing a new generation of viruses. When a cell is coinfecting by wildtype (WT) and gene-drive viruses, WT viruses are converted to new gene-drive viruses. The coinfection rate is calculated from the MOI, assuming a Poisson distribution. **a**, example of a simulation with a replicative fitness cost  $f=0.9$  for gene-drive viruses, and a coinfection rate of 1.8% (MOI=0.2). Left panel shows 50 independent simulations. Middle: mean and standard deviation of the 50 simulations. Right: mean proportion of the different viruses. **b**, Simulations with increasing coinfection rate and fitness cost of gene-drive viruses.
